# Supplementary material for: The regulation of glial-specific splicing ofNeurexin IVrequires HOW and Cdk12 activity
Source: Oxford University Press journal article supplement (doi:10.1242/dev.074070), 2012-03-30
Supplement: dev074070-tables1.pdf [file dev074070-tables1.pdf]

**Table S1. List of the analyzed genes**

| Name                                | Symbol          | Tool                      | Splicing change      |
|-------------------------------------|-----------------|---------------------------|----------------------|
| crooked neck                        | <i>crn</i>      | dsRNA                     | <b>Ex3 -&gt; Ex4</b> |
| held out wings                      | <i>how</i>      | dsRNA                     | <b>Ex3 -&gt; Ex4</b> |
| CG3542 (prp40)                      | CG3542          | dsRNA                     | <b>Ex3 -&gt; Ex4</b> |
| Abl tyrosine kinase                 | <i>abl</i>      | dsRNA                     | Ex3                  |
| Btk family kinase at 29A            | <i>btkat29A</i> | dsRNA                     | Ex3                  |
| Cyclin-dependent kinase 4           | <i>cdk4</i>     | dsRNA                     | Ex3                  |
| Cyclin-dependent kinase 12          | <i>cdk12</i>    | dsRNA                     | <b>Ex3 -&gt; Ex4</b> |
| fused                               | <i>fu</i>       | dsRNA                     | Ex3                  |
| G protein-coupled receptor kinase 2 | <i>gprk2</i>    | dsRNA                     | Ex3                  |
| rolled/mapk                         | <i>rl/ mapk</i> | dsRNA / dominant negative | Ex3                  |
| MAP kinase kinase 4                 | <i>mkk4</i>     | dsRNA                     | Ex3                  |
| cAMP-dependent protein kinase 1     | <i>pka-c1</i>   | dsRNA                     | Ex3                  |
| Phosphatidylinositol 3 kinase 59F   | <i>pi3k59f</i>  | dsRNA                     | Ex3                  |
| Phosphatidylinositol 3 kinase 68D   | <i>pi3k68d</i>  | dsRNA                     | Ex3                  |
| pole hole                           | <i>phl</i>      | dsRNA / dominant negative | <b>Ex3 -&gt; Ex4</b> |
| shaggy                              | <i>sgg</i>      | dsRNA                     | Ex3                  |
| Src oncogene at 42A                 | <i>src42</i>    | dsRNA                     | Ex3                  |
| Src oncogene at 64B                 | <i>src64B</i>   | dsRNA                     | Ex3                  |
| <b>RTK signaling components</b>     |                 |                           |                      |
| Epidermal growth factor receptor    | <i>egfr</i>     | dsRNA / dominant negative | <b>Ex3 -&gt; Ex4</b> |
| downstream of receptor kinase       | <i>drk</i>      | dsRNA                     | Ex3                  |
| Son of sevenless                    | <i>sos</i>      | dsRNA                     | Ex3                  |
| Ras oncogene at 85D                 | <i>ras85d</i>   | dsRNA / dominant negative | Ex3                  |
| Downstream of raf1                  | <i>dsor1</i>    | dsRNA                     | Ex3                  |
